# Supplementary material
Source: PubMed Central journal article supplement (PMC3293594)
Supplement: supp_M111.292946_jbc.M111.292946-1.pdf [file supp_M111.292946_jbc.M111.292946-1.pdf]

## Supplemental Figure 1

### A

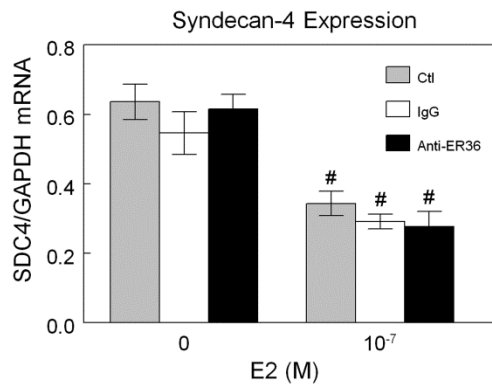

### B

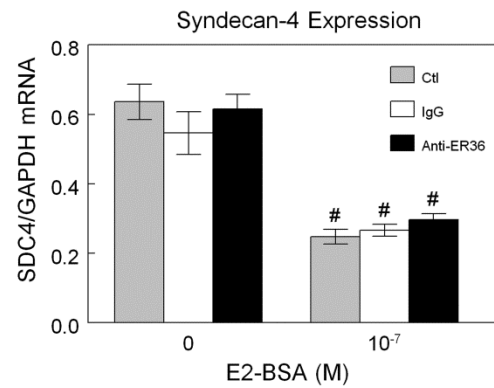

**Supplemental Figure 1.** Membrane estrogen signaling increases expression of membrane syndecan-4, but not through ER $\alpha$ 36. qRT-PCR analysis indicates that E<sub>2</sub> signaling in HCC38 cells increases expression of syndecan-4 (A), and E<sub>2</sub>-BSA has a similar effect (B). \* p<0.05 compared to control + vehicle (0M E<sub>2</sub>-BSA), # p<0.05 compared to control + 10<sup>-7</sup>M E<sub>2</sub>-BSA.
